# Supplementary material
Source: HighWire-hosted journal article supplement (http://ajnr-stage2.highwire.org/highwire/filestream/52856/field_highwire_adjunct_files/0/15-00769.pdf)
Supplement: 15-00769.pdf [file 15-00769.pdf]

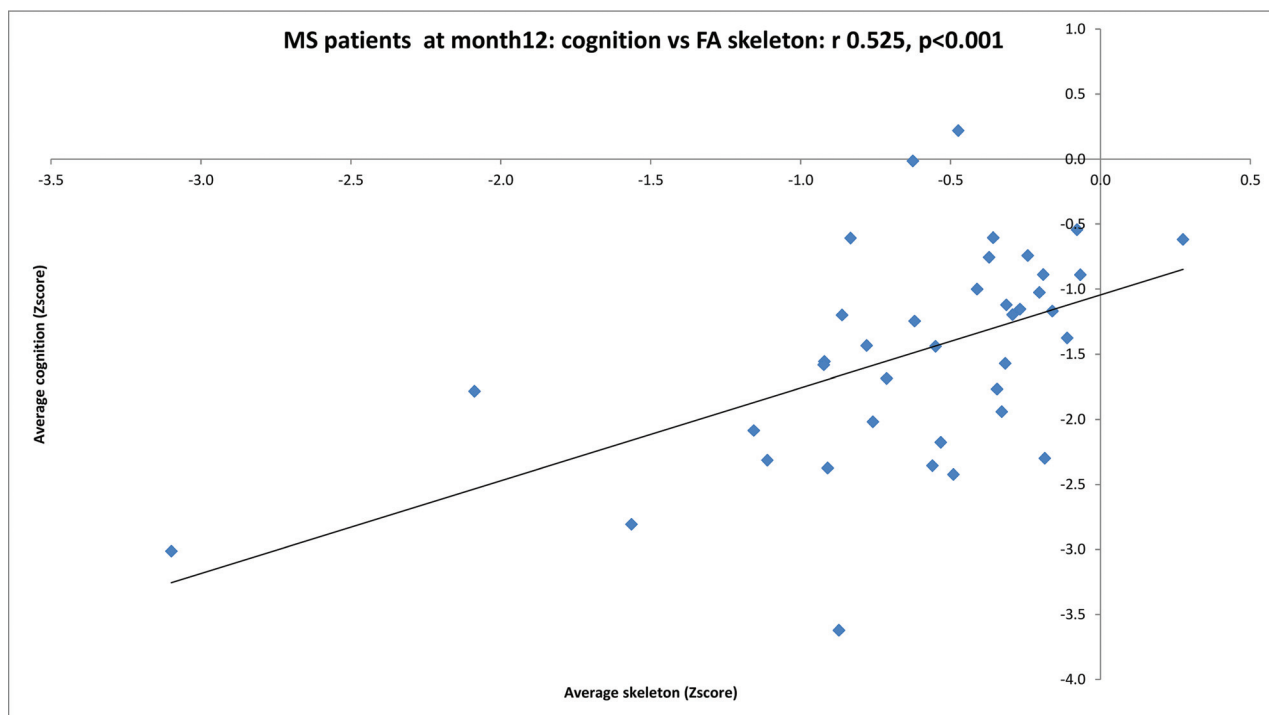

**ON-LINE FIGURE.** Correlation between average cognition z score and average skeleton z score of patients with MS at month 12.
